# Supplementary material for: Synthesis Mechanisms, Structural Models, and Photothermal Therapy Applications of Top-Down Carbon Dots from Carbon Powder, Graphite, Graphene, and Carbon Nanotubes
Source: MDPI journal article supplement (doi:10.3390/ijms23031456), 2022-01-27
Supplement: s1 [file s1]

## **Supplementary Materials**

### **Synthesis Mechanisms, Structural Models and Photothermal Therapy Applications of Top-Down Carbon Dots from Carbon Powder, Graphite, Graphene and Carbon Nanotubes**

Wenquan Shi,<sup>a,b,+</sup> Qiurui Han,<sup>a,+</sup> Jiajia Wu,<sup>a</sup> Chunyu Ji,<sup>a</sup> Yiqun Zhou,<sup>c</sup> Shanghao Li,<sup>d</sup>  
Lipeng Gao,<sup>a</sup> Roger M. Leblanc<sup>c</sup> and Zhili Peng,<sup>\*a,b</sup>

<sup>a</sup>School of Materials and Energy, Yunnan University, Kunming 650091, People's Republic of China.

<sup>b</sup>Advanced Computing Center, Materials Genome Institute, Yunnan University, Kunming 650091, P. R. China

<sup>c</sup>Department of Chemistry, University of Miami, 1301 Memorial Drive, Coral Gables, Florida 33146, United States.

<sup>d</sup>MP Biomedicals, 9 Goddard, Irvine, CA 92618, USA.

#### **\*Corresponding authors:**

(Z. P.) Tel.: +86–871–65037399; E-mail: [zhilip@ynu.edu.cn](mailto:zhilip@ynu.edu.cn).

<sup>+</sup>These authors contributed equally to this work.

#### **Keywords:**

Carbon dots; carbon nano powders; graphite; graphene; carbon nano tubes; photothermal therapy

**Table S1.** Effects of reaction temperature, time and scale on the yields of GR-CDs

|          | Mass<br>(mg) | H <sub>2</sub> SO <sub>4</sub><br>(mL) | HNO <sub>3</sub><br>(mL) | Temperature<br>(°C) | Time<br>(h) | Yield<br>(%) |
|----------|--------------|----------------------------------------|--------------------------|---------------------|-------------|--------------|
| <b>1</b> | <b>250</b>   | <b>9</b>                               | <b>3</b>                 | <b>110</b>          | <b>7.5</b>  | <b>10</b>    |
| <b>2</b> | <b>250</b>   | <b>9</b>                               | <b>3</b>                 | <b>75</b>           | <b>15</b>   | <b>3</b>     |
| <b>3</b> | <b>500</b>   | <b>18</b>                              | <b>6</b>                 | <b>110</b>          | <b>15</b>   | <b>11</b>    |

**Table S2.** Volumes of NaOH solution consumed for titrations of CDs and the corresponding carboxyl contents determined for each CDs

| Sample         | V <sub>NaOH</sub> consumed (mL) | -COOH (mmol/g) |
|----------------|---------------------------------|----------------|
| <b>C-CDs</b>   | 1.7                             | 6.8            |
|                | 1.7                             | 6.8            |
|                | 1.5                             | 6.0            |
| <b>G-CDs</b>   | 1.1                             | 4.4            |
|                | 1.0                             | 4.0            |
|                | 1.1                             | 4.4            |
| <b>GR-CDs</b>  | 1.0                             | 4.0            |
|                | 1.2                             | 4.8            |
|                | 1.1                             | 4.4            |
| <b>CNT-CDs</b> | 2.2                             | 8.8            |
|                | 2.1                             | 8.4            |
|                | 2.1                             | 8.4            |

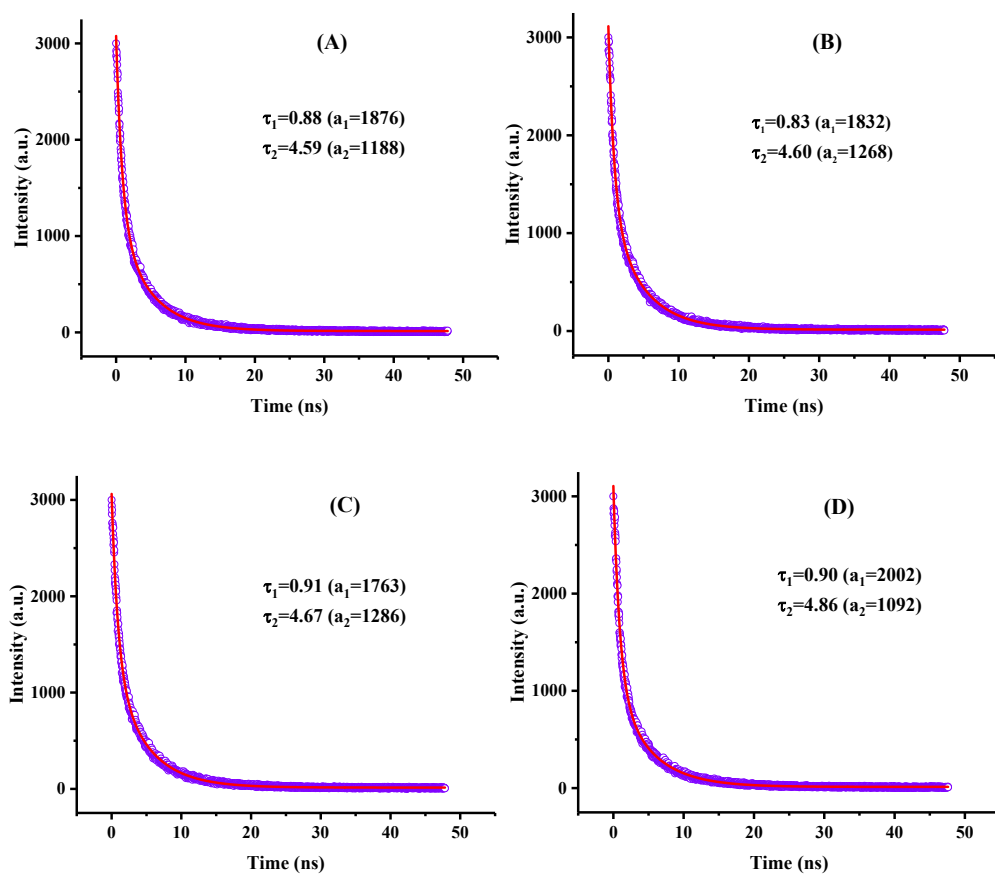

**Figure S1.** The photoluminescence decay curves of C-CDs (A), G-CDs (B), GR-CDs (C) and CNT-CDs (D) in 0.5 mg/mL aqueous solution, excited at 475 nm.

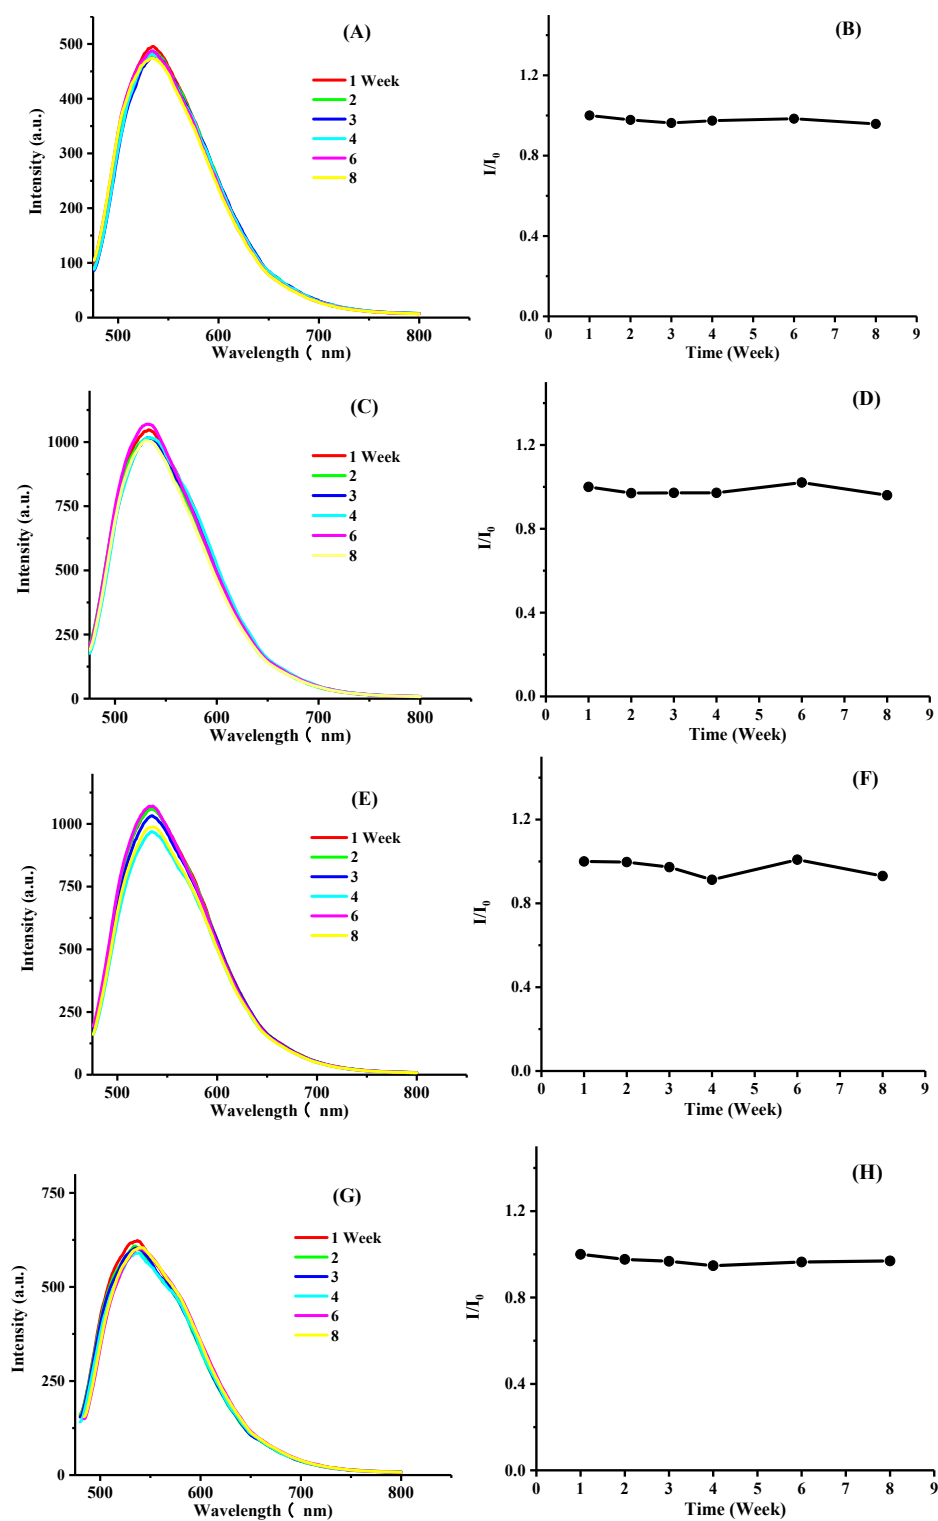

**Figure S2.** Photoluminescence stability tests of 0.5 mg/mL of C-CDs (A, B), G-CDs (C, D), GR-CDs (E, F) and CNT-CDs (G, H): solutions of CDs were placed in the ambient environment and their fluorescence emissions (excited at 460 nm) were monitored for two months.

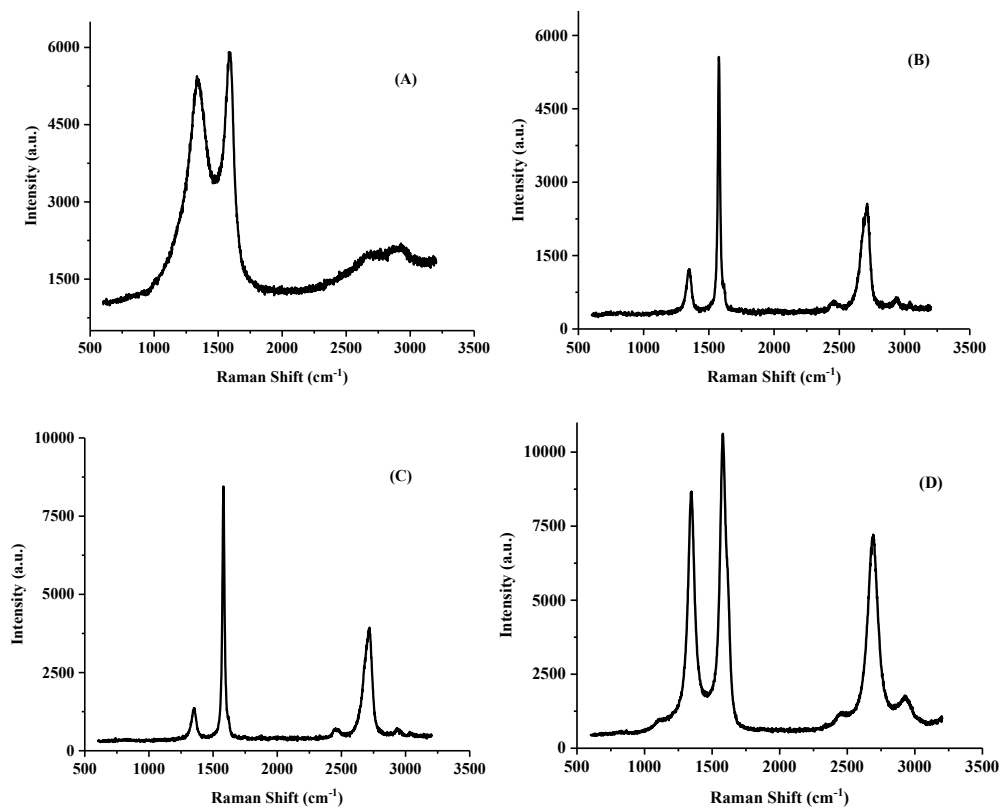

**Figure S3.** Raman spectra of carbon powders (A), graphite (B), graphene (C) and carbon nanotubes (D) used to synthesize CDs in this study.

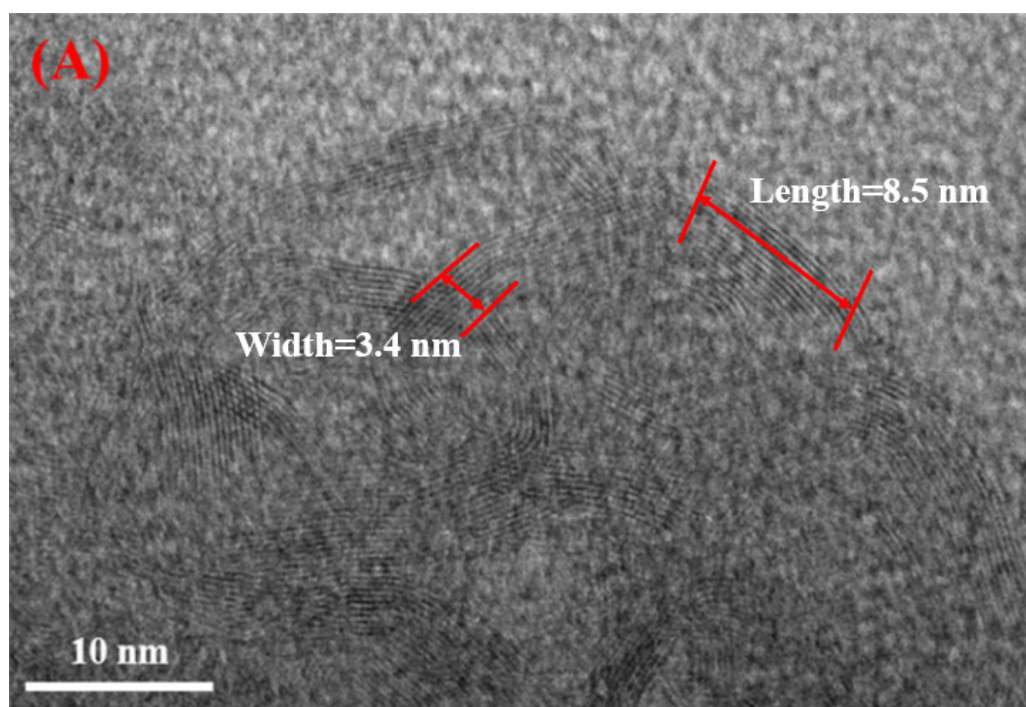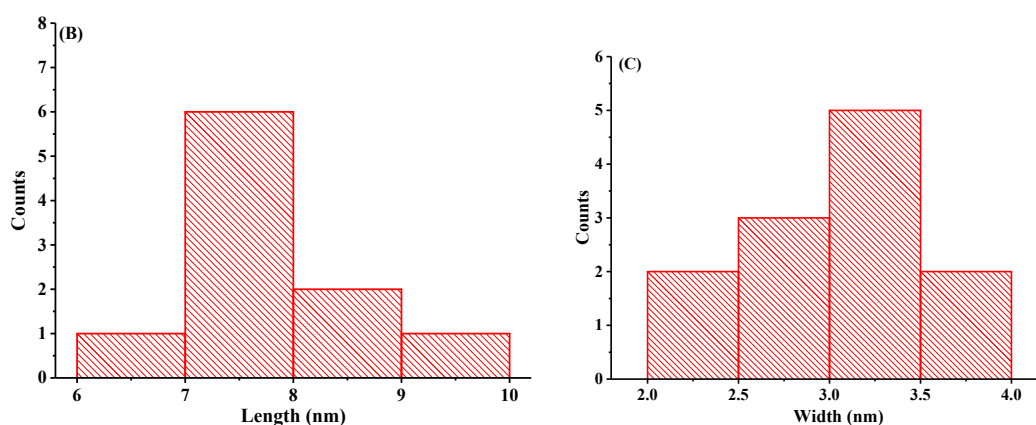

**Figure S4.** TEM image of broken carbon nanotubes (A), and the histograms showing the distributions of length (B) and width (C) of these pieces

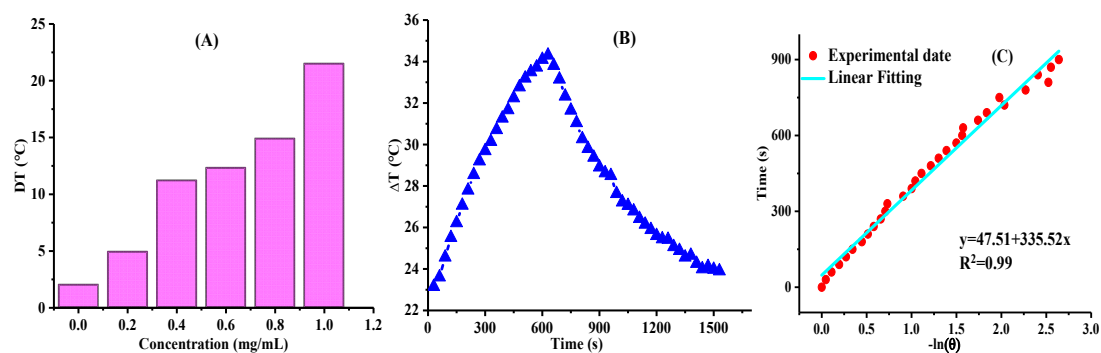

**Figure S5.** Photothermal properties of C-CDs: (A) Temperature change ( $\Delta T$ ) diagram of water and C-CDs solutions with concentrations range from 0.2 to 1.0 mg/mL after laser irradiation for 10 minutes; (B) Photothermal effect of 1 mL of C-CDs solution with concentration of 0.4 mg/mL after laser irradiation for 10 minutes; (C) Linear relationship between cooling time and  $-\ln(\theta)$  obtained from Figure S5B.

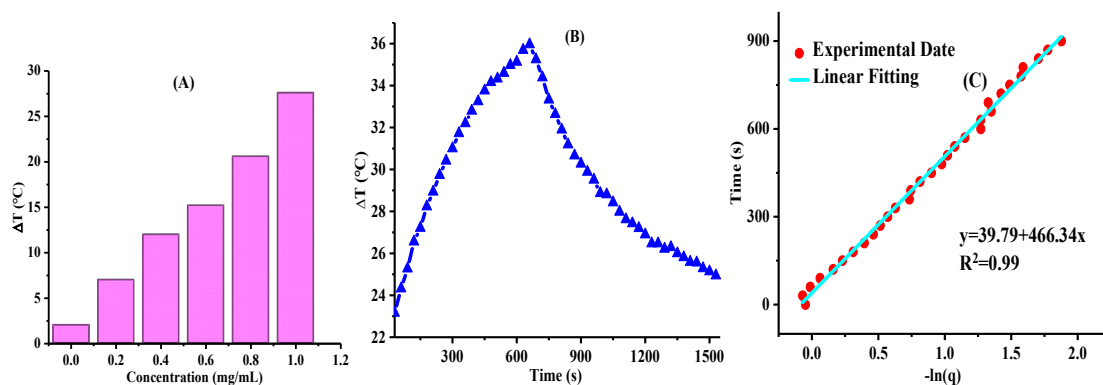

**Figure S6.** Photothermal properties of G-CDs: (A) Temperature change ( $\Delta T$ ) diagram of water and G-CDs solutions with concentrations range from 0.2 to 1.0 mg/mL after laser irradiation for 10 minutes; (B) Photothermal effect of 1 mL of G-CDs solution with concentration of 0.4 mg/mL after laser irradiation for 10 minutes; (C) Linear relationship between cooling time and  $-\ln(\theta)$  obtained from Figure S6B.

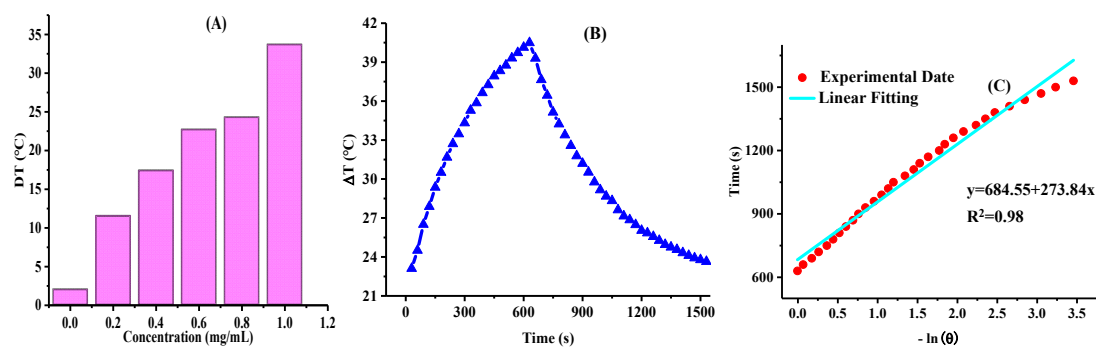

**Figure S7.** Photothermal properties of GR-CDs: (A) Temperature change ( $\Delta T$ ) diagram of water and GR-CDs solutions with concentrations range from 0.2 to 1.0 mg/mL after laser irradiation for 10 minutes; (B) Photothermal effect of 1 mL of GR-CDs solution with concentration of 0.4 mg/mL after laser irradiation for 10 minutes; (C) Linear relationship between cooling time and  $-\ln(\theta)$  obtained from Figure S7B.

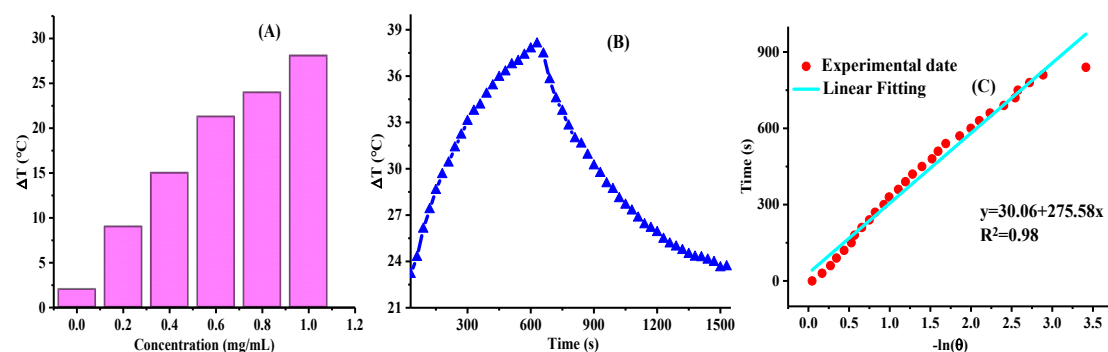

**Figure S8.** Photothermal properties of CNT-CDs: (A) Temperature change ( $\Delta T$ ) diagram of water and CNT-CDs solutions with concentrations range from 0.2 to 1.0 mg/mL after laser irradiation for 10 minutes; (B) Photothermal effect of 1 mL of CNT-CDs solution with concentration of 0.4 mg/mL after laser irradiation for 10 minutes; (C) Linear relationship between cooling time and  $-\ln(\theta)$  obtained from Figure S8B.
